# Supplementary material for: Responses of surface ozone to future agricultural ammonia emissions and subsequent nitrogen deposition through terrestrial ecosystem changes
Source: Copernicus journal article supplement (doi:10.5194/acp-2021-492), 2021-08-03
Supplement: Supplementary file 1 [file acp-2021-492-supplement.pdf]

1 **Supplementary of**  
2 **Responses of surface ozone to future agricultural ammonia emissions and subsequent nitrogen deposition**  
3 **through terrestrial ecosystem feedbacks**

4 Xueying Liu, et al.

5 *Correspondence to: Amos P. K. Tai (amostai@cuhk.edu.hk)*

6 **S1 Implementation of soil NO<sub>x</sub> and NH<sub>3</sub> emission in CLM4.5-BGC**

7 **S1.1 Soil NO<sub>x</sub>**

8 We incorporate new equations to calculate NO<sub>x</sub> released as by-products of nitrification and denitrification. Default  
9 CLM estimates the amount of N<sub>2</sub>O leakage during nitrification by applying a constant scale factor to the  
10 nitrification rate (Li et al., 2000) while that from denitrification is variable and evaluated using the Century  
11 approach (Del Grosso et al., 2000). Building on the work of previous studies (Parton et al., 2001, 2004; Zhao et  
12 al., 2017), we compute a ratio of NO<sub>x</sub> to N<sub>2</sub>O to account for the leaking of the former during nitrification and  
13 denitrification using the following equations:

$$\text{NO}_x:\text{N}_2\text{O} = 15.2 + \frac{35.5 \tan^{-1}[0.68\pi(10D_r - 1.86)]}{\pi} \quad \text{Eq. 1}$$

14 where  $D_r$  is the relative gas diffusivity of soil vs. air and is calculated as a function of air-filled pore space (AFPS)  
15 of soil (Davidson and Trumbore, 1995):

$$D_r = 0.209\text{AFPS}^{\frac{4}{3}} \quad \text{Eq. 2}$$

$$\text{AFPS} = 1 - \frac{\theta_v}{\theta_{v,\text{sat}}} \quad \text{Eq. 3}$$

16 where  $\theta_v$  and  $\theta_{v,\text{sat}}$  are instantaneous and saturated volumetric soil water content (in  $\text{m}^3 \text{m}^{-3}$ ), respectively.

17  
18 In addition, we also rectify a coding mistake in CLM by restoring a missing 20% of microbial mineralized nitrogen  
19 for nitrification to correct the rapid denitrification in previous versions (Parton et al., 2001), and applied a  
20 temperature factor to correct the overestimation at high latitudes as suggested in some previous studies (Xu and  
21 Prentice, 2008; Zhao et al., 2017):

$$f_T = \min\left(1, e^{308.56\left(\frac{1}{68.02} - \frac{1}{T_{\text{soil}} + 46.02}\right)}\right) \quad \text{Eq. 4}$$

22 where  $T_{\text{soil}}$  is soil temperature in Kelvin (K).

23  
24 **S1.2 Soil NH<sub>3</sub>**

25 We add into this model a new NH<sub>3</sub> emission scheme consistent with another standalone biogeochemical model,  
26 DNDC version 9.5 (Li et al., 2012), which has been used for studying agricultural NH<sub>3</sub> emission (Balasubramanian  
27 et al., 2015, 2017; Zhang and Niu, 2016).

28  
29 For each model soil layer, NH<sub>3</sub> volatilization is considered as a multistage process, which is formulated as:

$$\frac{d[\text{NH}_3(\text{g})]}{dt}_{\text{soil}} = [\text{NH}_4^+(\text{soil})](1 - f_{\text{ads}})f_{\text{dis}}f_{\text{vol}}\left(\frac{1}{\Delta t}\right) \quad \text{Eq. 5}$$

1 where  $[\text{NH}_4^+_{(\text{soil})}]$  (in  $\text{g-N m}^{-2}$ ) is the amount of soil  $\text{NH}_4^+$ ;  $\Delta t$  is model time step size in CLM (default = 30 min  
2 or 1800 s).

3

4 Due to electrostatic attraction, a portion of soil  $\text{NH}_4^+$  adsorbs on the naturally negatively charged surface of soil  
5 particles. Our scheme estimates the fraction of  $\text{NH}_4^+$  adsorbed,  $f_{\text{ads}}$ , as:

$$f_{\text{ads}} = 0.99(7.2733f_{\text{clay}}^3 - 11.22f_{\text{clay}}^2 + 5.7198f_{\text{clay}} + 0.0263) \quad \text{Eq. 6}$$

6 where  $f_{\text{clay}}$  is soil clay fraction as prescribed by the CLM surface data (Bonan et al., 2002).

7

8 The non-adsorbed  $\text{NH}_4^+$  dissociates reversibly into aqueous  $\text{NH}_3$  and hydrogen ion ( $\text{NH}_4^+_{(\text{aq})} \rightleftharpoons \text{NH}_3_{(\text{aq})} + \text{H}^+$ ). The  
9 fraction of such  $\text{NH}_4^+$  dissociated into aqueous  $\text{NH}_3$ ,  $f_{\text{dis}}$ , is determined by the following equations (Li et al., 2012):

$$f_{\text{dis}} = \frac{K_w}{K_a[\text{H}^+]} \quad \text{Eq. 7}$$

$$K_w = 10^{0.08946+0.03605T_{\text{soil}}} \times 10^{-15} \quad \text{Eq. 8}$$

$$K_a = (1.416 + 0.01357T_{\text{soil}}) \times 10^{-5} \quad \text{Eq. 9}$$

$$[\text{H}^+] = 10^{-\text{pH}} \quad \text{Eq. 10}$$

10 where  $K_a$  (in  $\text{mol L}^{-1}$ ) and  $K_w$  (in  $\text{mol L}^{-2}$ ) are dissociation constants for  $\text{NH}_4^+/\text{NH}_3$  and hydrogen-/hydroxide-ion  
11 equilibria, respectively;  $T_{\text{soil}}$  (in  $^\circ\text{C}$ ) is soil temperature;  $[\text{H}^+]$  (in  $\text{mol}$ ) is the concentration of aqueous hydrogen  
12 ion in the soil calculated from soil pH. The model has yet to be capable of calculating soil pH implicitly, and  $\text{NH}_3$   
13 volatilization is sensitive to soil pH, so we perform our simulations using a constant pH of 6.8, as is adopted by  
14 DNDC, for a more concise analysis.

15

16 Lastly, we use this equation to calculate the fraction of aqueous  $\text{NH}_3$  volatilized as gaseous  $\text{NH}_3$ ,  $f_{\text{vol}}$ :

$$f_{\text{vol}} = \left(\frac{1.5s}{1+s}\right) \left(\frac{T_{\text{soil}}}{50+T_{\text{soil}}}\right) \left(\frac{l_{\text{max}}-l}{l_{\text{max}}}\right) \quad \text{Eq. 11}$$

17 where  $s$  (in  $\text{m s}^{-1}$ ) is surface wind speed;  $T_{\text{soil}}$  (in  $^\circ\text{C}$ ) is soil temperature;  $l$  and  $l_{\text{max}}$  (both in  $\text{m}$ ) are the depth of  
18 each particular soil layer and the maximum depth of a soil column, respectively.

19

1 **S2 Supplementary figures**

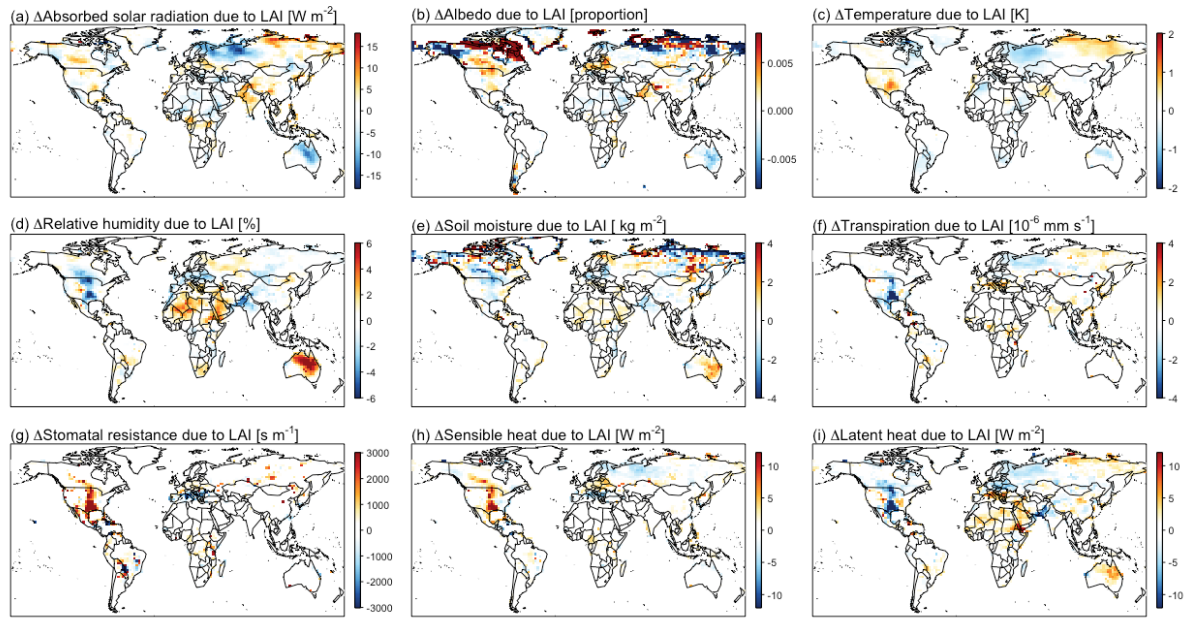

**Figure S1.** Summertime changes in (a) absorbed solar radiation, (b) albedo, (c) 2-meter surface temperature, (d) 2-meter relative humidity, (e) soil moisture, (f) vegetation transpiration, (g) stomatal resistance, (h) sensible heat flux, and (i) latent heat flux driven by LAI increase under dynamic meteorology.

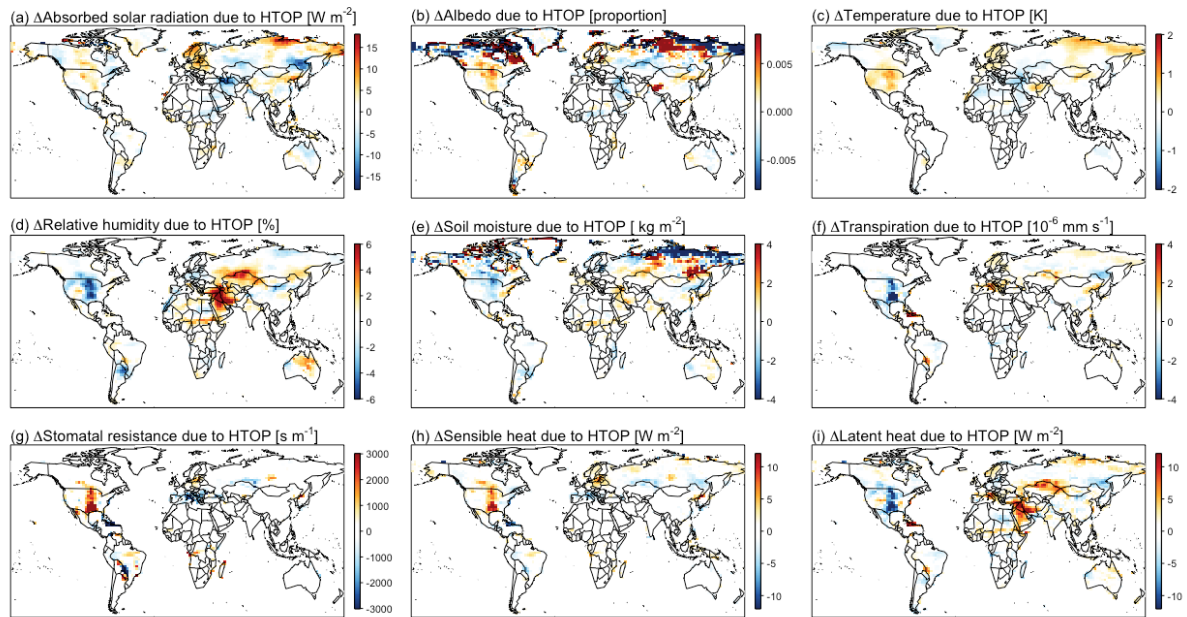

**Figure S2.** Same as Fig.S1 but driven by canopy height increase.

1 **Reference:**

- 2 Balasubramanian, S., Koloutsou-Vakakis, S., McFarland, D. M. and Rood, M. J.: Reconsidering emissions of  
3 ammonia from chemical fertilizer usage in midwest USA, *J. Geophys. Res.*, 120(12), 6232–6246,  
4 doi:10.1002/2015JD023219, 2015.
- 5 Balasubramanian, S., Nelson, A., Koloutsou-Vakakis, S., Lin, J., Rood, M. J., Myles, L. T. and Bernacchi, C.:  
6 Evaluation of DeNitrification DeComposition model for estimating ammonia fluxes from chemical fertilizer  
7 application, *Agric. For. Meteorol.*, 237–238, 123–134, doi:10.1016/j.agrformet.2017.02.006, 2017.
- 8 Bonan, G. B., Levis, S., Kergoat, L. and Oleson, K. W.: Landscapes as patches of plant functional types: An  
9 integrating concept for climate and ecosystem models, *Global Biogeochem. Cycles*, 16(2), 5-1-5–23,  
10 doi:10.1029/2000gb001360, 2002.
- 11 Davidson, E. A. and Trumbore, S. E.: Gas diffusivity and production of CO<sub>2</sub> in deep soils of the eastern  
12 Amazon, *Tellus B*, 47(5), 550–565, doi:10.1034/j.1600-0889.47.issue5.3.x, 1995.
- 13 Del Grosso, S. J., Parton, W. J., Mosier, A. R., Ojima, D. S., Kulmala, A. E. and Phongpan, S.: General model  
14 for N<sub>2</sub>O and N<sub>2</sub> gas emissions from soils due to denitrification, *Global Biogeochem. Cycles*, 14(4), 1045–  
15 1060, doi:10.1029/1999GB001225, 2000.
- 16 Li, C., Aber, J., Stange, F., Butterbach-Bahl, K. and Papen, H.: A process-oriented model of N<sub>2</sub>O and NO  
17 emissions from forest soils: 1. Model development, *J. Geophys. Res. Atmos.*, 105(D4), 4369–4384,  
18 doi:10.1029/1999JD900949, 2000.
- 19 Li, C., Salas, W., Zhang, R., Krauter, C., Rotz, A. and Mitloehner, F.: Manure-DNDC: A biogeochemical  
20 process model for quantifying greenhouse gas and ammonia emissions from livestock manure systems, *Nutr.*  
21 *Cycl. Agroecosystems*, 93(2), 163–200, doi:10.1007/s10705-012-9507-z, 2012.
- 22 Parton, W. J., Holland, E. A., Del Grosso, S. J., Hartman, M. D., Martin, R. E., Mosier, A. R., Ojima, D. S. and  
23 Schimel, D. S.: Generalized model for NO<sub>x</sub> and N<sub>2</sub>O emissions from soils, *J. Geophys. Res. Atmos.*,  
24 106(D15), 17403–17419, doi:10.1029/2001JD900101, 2001.
- 25 Parton, W. J., Holland, E. A., Del Grosso, S. J., Hartman, M. D., Martin, R. E., Mosier, A. R., Ojima, D. S. and  
26 Schimel, D. S.: Generalized model for NO<sub>x</sub> and N<sub>2</sub>O emissions from soils, *J. Geophys. Res. Atmos.*,  
27 106(D15), 17403–17419, doi:10.1029/2001jd900101, 2004.
- 28 Xu, R. and Prentice, I. C.: Terrestrial nitrogen cycle simulation with a dynamic global vegetation model, *Glob.*  
29 *Chang. Biol.*, 14(8), 1745–1764, doi:10.1111/j.1365-2486.2008.01625.x, 2008.
- 30 Zhang, Y. and Niu, H.: The development of the DNDC plant growth sub-model and the application of DNDC in  
31 agriculture: A review, *Agric. Ecosyst. Environ.*, 230, 271–282, doi:10.1016/j.agee.2016.06.017, 2016.
- 32 Zhao, Y., Zhang, L., Tai, A. P. K., Chen, Y. and Pan, Y.: Responses of surface ozone air quality to  
33 anthropogenic nitrogen deposition in the Northern Hemisphere, *Atmos. Chem. Phys.*, 17(16), 9781–9796,  
34 doi:10.5194/acp-17-9781-2017, 2017.

35
